# Supplementary material
Source: ML conference proceedings conference paper supplement (https://proceedings.mlr.press/v70/arora17a.html)
Supplement: Supplementary file [file arora17a-supp.pdf]

# Generalization and Equilibrium in Generative Adversarial Nets (GANs)

Sanjeev Arora\*   Rong Ge †   Yingyu Liang‡   Tengyu Ma§   Yi Zhang¶

## Abstract

*Generalization* is defined training of generative adversarial network (GAN), and it's shown that generalization is not guaranteed for the popular distances between distributions such as Jensen-Shannon or Wasserstein. In particular, training may appear to be successful and yet the trained distribution may be arbitrarily far from the target distribution in standard metrics. It is shown that generalization does occur for a much weaker metric we call *neural net distance*. It is also shown that an approximate pure equilibrium exists in the discriminator/generator game for a natural training objective (Wasserstein) when generator capacity and training set sizes are moderate.

Finally, the above theoretical ideas suggest a new training protocol, MIX+GAN, which can be combined with any existing method, and empirically is found to improve some existing GAN protocols out of the box.

## 1 Introduction

Generative Adversarial Networks (GANs) [Goodfellow et al., 2014] have become one of the dominant methods for fitting generative models to complicated real-life data, and even found unusual uses such as designing good cryptographic primitives [Abadi and Andersen, 2016]. See a survey by Goodfellow [2016]. Various novel architectures and training objectives were introduced to address perceived shortcomings of the original idea, leading to more stable training and more realistic generative models in practice (see Odena et al. [2016], Huang et al. [2017], Radford et al. [2016], Tolstikhin et al. [2017], Salimans et al. [2016], Jiwoong Im et al. [2016], Durugkar et al. [2016] and the reference therein).

The goal is to train a *generator* deep net whose input is a standard Gaussian, and whose output is a sample from some distribution  $\mathcal{D}$  on  $\mathfrak{R}^d$ , which has to be close to some real-life distribution  $\mathcal{D}_{real}$  (which could be, say, real-life images represented using raw pixels). The training uses samples from  $\mathcal{D}_{real}$  and trains the generator net together with a *discriminator* deep net that is trained to maximise its ability to distinguish between samples from  $\mathcal{D}_{real}$  and  $\mathcal{D}$ . So long as the discriminator is successful at this task with nonzero probability, its success can be used to generate a feedback (using backpropagation) to the generator, thus improving its distribution  $\mathcal{D}$ . Training is continued

---

\*Princeton University, Computer Science Department, email: arora@cs.princeton.edu

†Duke University, Computer Science Department, email: rongge@cs.duke.edu

‡Princeton University, Computer Science Department, email: yingyul@cs.princeton.edu

§Princeton University, Computer Science Department, email: tengyu@cs.princeton.edu

¶Princeton University, Computer Science Department, email: yz7@cs.princeton.edu

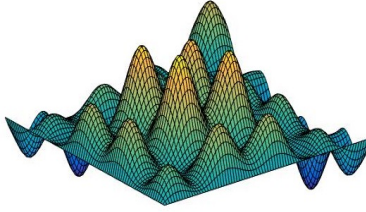

Figure 1: Probability density  $\mathcal{D}_{real}$  with many peaks and valleys

until the generator *wins*, meaning that the discriminator can do no better than random guessing when deciding whether or not a particular sample came from  $\mathcal{D}$  or  $\mathcal{D}_{real}$ . This basic iterative framework has been tried with many training objectives; see Section 2. But it has been unclear what to conclude when the generator wins this game: is  $\mathcal{D}$  close to  $\mathcal{D}_{real}$  in some metric? One seems to need some extension of *generalization theory* that would imply such a conclusion. The hurdle is that distribution  $\mathcal{D}_{real}$  could be complicated and may have many peaks and valleys; see Figure 1. The number of peaks (modes) may even be exponential in  $d$ . (Recall the *curse of dimensionality*: in  $d$  dimensions there are  $\exp(d)$  directions whose pairwise angle exceeds say  $\pi/3$ , and each could be the site of a peak.) Whereas the number of samples from  $\mathcal{D}_{real}$  (and from  $\mathcal{D}$  for that matter) used in the training is a lot fewer, and thus may not reflect most of the peaks and valleys of  $\mathcal{D}_{real}$ .

A standard analysis due to [Goodfellow et al., 2014] shows that when the discriminator capacity (= number of parameters) and number of samples is “large enough”, then a win by the generator implies that  $\mathcal{D}$  is very close to  $\mathcal{D}_{real}$  (see Section 2). But the discussion in the previous paragraph raises the possibility that “sufficiently large” in this analysis may need to be  $\exp(d)$ .

A second theoretical issue that remains open is whether an equilibrium always exists in this game between generator and discriminator. Just as a zero gradient is a necessary condition for standard optimization to halt, the corresponding necessary condition in a two-player game is an equilibrium. Conceivably absence of an equilibrium could cause some of the instability often observed while training GANs. (Recently Arjovsky et al. [2017] suggest that empirically, using their Wasserstein objective reduces instability, but we still lack proof of existence of an equilibrium.) Standard game theory is of no help here because we need a so-called pure equilibrium, and simple counter-examples such as *rock/paper/scissors* show that it doesn’t exist in general<sup>1</sup>.

## 1.1 Our contributions

We formally define generalization for GANs in Section 3 and show that for previously studied notions of distance between distributions, generalization is not guaranteed (Lemma 1). In fact we show that the generator can win even when  $\mathcal{D}$  and  $\mathcal{D}_{real}$  are arbitrarily far in any standard metric.

However, we can guarantee some weaker notion of generalization by introducing a new metric on distributions, the *neural net distance*. We show that generalization does happen with moderate number of training examples (i.e., when the generator wins, the two distributions must be close in neural net distance).

To explore the existence of equilibria we turn in Section 4 to infinite mixtures of generator deep

---

<sup>1</sup>Such counterexamples are easily turned into toy GAN scenarios with generator and discriminator having finite capacity, and the game lacks a pure equilibrium. See Section B.

nets. These are clearly vastly more expressive than a single generator net: e.g., a standard result in bayesian nonparametrics says that every probability density is closely approximable by an infinite mixture of Gaussians [Ghosh et al., 2003]. Thus unsurprisingly, an infinite mixture should win the game. We then prove rigorously that even a finite mixture of fairly reasonable size can closely approximate the performance of the infinite mixture (Theorem 4.2).

This insight also allows us to show for a natural GAN setting with Wasserstein objective there exists an *approximate* equilibrium that is pure. (Roughly speaking, an approximate equilibrium is one in which neither of the players can gain much by deviating from their strategies.)

This existence proof for an approximate equilibrium unfortunately involves a quadratic blowup in the “size” of the generator (which is still better than the naive exponential blowup one might expect). Improving this is left for future theoretical work. But we introduce a heuristic approximation to the mixture idea to introduce a new framework for training that we call MIX+GAN. It can be added on top of any existing GAN training procedure, including those that use divergence objectives. Experiments (reported in Section 6) show that for several previous techniques, MIX+GAN stabilizes the training, and in some cases improves the performance.

## 2 Preliminaries

**Notations:** Throughout the paper we use  $d$  for the dimension of samples, and  $p$  for the number of parameters in the generator/discriminator. In Section 3 we use  $m$  for number of samples.

**Generators and discriminators:** Let  $\{G_u, u \in \mathcal{U}\}$  ( $\mathcal{U} \subset \mathbb{R}^p$ ) denote the class of generators, where  $G_u$  is a function — which is often a neural network in practice — from  $\mathbb{R}^\ell \rightarrow \mathbb{R}^d$  indexed by  $u$  that denotes the parameters of the generators. Here  $\mathcal{U}$  denotes the possible ranges of the parameters and without loss of generality we assume  $\mathcal{U}$  is a subset of the unit ball<sup>2</sup>. The generator  $G_u$  defines a distribution  $\mathcal{D}_{G_u}$  as follows: we generate  $h$  from  $\ell$ -dimensional spherical Gaussian distribution and then apply  $G_u$  on  $h$  and generate a sample  $x = G_u(h)$  of the distribution  $\mathcal{D}_{G_u}$ . We drop the subscript  $u$  in  $\mathcal{D}_{G_u}$  when it’s clear from context.

Let  $\{D_v, v \in \mathcal{V}\}$  denotes the class of discriminators, where  $D_v$  is function from  $\mathbb{R}^d$  to  $[0, 1]$  and  $v$  is the parameters of  $D_v$ . The value  $D_v(x)$  is usually interpreted as the probability that the sample  $x$  comes from the real distribution  $\mathcal{D}_{real}$  (as opposed to the generated distribution  $\mathcal{D}_G$ ).

In most neural network architectures, if the parameters (weights, biases) change by a small amount, this makes only a small difference in the output. We capture this phenomena by assuming  $G_u$  and  $D_v$  are  $L$ -Lipschitz with respect to their parameters. For the generator this means using similar parameters and the same input, we can generate similar examples. Thus for all  $u, u' \in \mathcal{U}$  and any input  $h$ , we have  $\|G_u(h) - G_{u'}(h)\| \leq L\|u - u'\|$ . For the discriminator the Lipschitz condition implies that for two discriminators using similar parameters, the output on every sample is quite similar. More precisely, Similarly for all  $v, v' \in \mathcal{V}$  and any sample  $x$ , we have  $|D_v(x) - D_{v'}(x)| \leq L\|v - v'\|$ . Notice, this is distinct from the assumption (which we will also sometimes make) that functions  $G_u, D_v$  are Lipschitz: that focuses on the change in function value when we change  $x$ , while keeping  $u, v$  fixed<sup>3</sup>.

<sup>2</sup>otherwise we can scale the parameter properly by changing the parameterization.

<sup>3</sup>Both Lipschitz parameters can be exponential in the number of layers in the neural net, however our Theorems only depend on the log of the Lipschitz parameters

**Objective functions.** The standard GAN training [Goodfellow et al., 2014] consists of training parameters  $u, v$  so as to optimize an objective function:

$$\min_{u \in \mathcal{U}} \max_{v \in \mathcal{V}} \mathbb{E}_{x \sim \mathcal{D}_{real}} [\log D_v(x)] + \mathbb{E}_{x \sim \mathcal{D}_{G_u}} [\log(1 - D_v(x))]. \quad (1)$$

Intuitively, this says that the discriminator  $D_v$  should give high values  $D_v(x)$  to the real samples and low values  $D_v(x)$  to the generated examples. The log function was suggested because it’s interpretation as the likelihood, and it enjoys a nice information-theoretic interpretation described below as well. However, in practice it can cause problems since  $\log x \rightarrow -\infty$  as  $x \rightarrow 0$ . The objective still makes intuitive sense if we replace log by any monotone function  $\phi : [0, 1] \rightarrow \mathbb{R}$ , which yields the objective:

$$\min_{u \in \mathcal{U}} \max_{v \in \mathcal{V}} \mathbb{E}_{x \sim \mathcal{D}_{real}} [\phi(D_v(x))] + \mathbb{E}_{x \sim \mathcal{D}_{G_u}} [\phi(1 - D_v(x))]. \quad (2)$$

We call function  $\phi$  the *measuring function*. It should be concave so that when  $\mathcal{D}_{real}$  and  $\mathcal{D}_G$  are the same distribution, the best strategy for the discriminator is just to output  $1/2$  and the optimal value is  $2\phi(1/2)$ . In later proofs, we will require  $\phi$  to be bounded and Lipschitz. Indeed, in practice training often uses  $\phi(x) = \log(\delta + (1 - \delta)x)$  (which takes values in  $[\log \delta, 0]$  and is  $1/\delta$ -Lipschitz) and the recently proposed Wasserstein GAN [Arjovsky et al., 2017] objective uses  $\phi(x) = x$ .

**Training with finite samples** The objective function (2) assumes we have infinite examples from  $\mathcal{D}_{real}$  to estimate the value  $\mathbb{E}_{x \sim \mathcal{D}_{real}}[\phi(D_v(x))]$ . With finite training examples  $x_1, \dots, x_m \sim \mathcal{D}_{real}$ , in the training, one uses  $\frac{1}{m} \sum_{i=1}^m [\phi(D_v(x_i))]$  to estimate the quantity  $\mathbb{E}_{x \sim \mathcal{D}_{real}}[\phi(D_v(x))]$ . We call the distribution that gives  $1/m$  probability to each of the  $x_i$ ’s the *empirical version* of the real distribution. Similarly, one can use a empirical version to estimate  $\mathbb{E}_{x \sim \mathcal{D}_{G_u}}[\phi(1 - D_v(x))]$ .

**Standard interpretation via distance between distributions.**<sup>4</sup> Towards analyzing GANs, researchers have assumed the access to *infinite* number of examples and that the discriminator is chosen optimally within some *large* class of functions that contain all possible neural nets. This often allows computing analytically the optimal discriminator and therefore removing the maximum operation from the objective (2), which leads to some interpretation of how and in what sense the resulting distribution  $\mathcal{D}_G$  is close to the true distribution  $\mathcal{D}_{real}$ .

Using the original objective function (1), then the optimal choice among all the possible functions from  $\mathbb{R}^d \rightarrow (0, 1)$  is  $D(x) = \frac{P_{real}(x)}{P_{real}(x) + P_G(x)}$ , as shown in Goodfellow et al. [2014]. Here  $P_{real}(x)$  is the density of  $x$  in the real distribution, and  $P_G(x)$  is the density of  $x$  in the distribution generated by generator  $G$ . Using this discriminator — though it’s computationally infeasible to obtain it — one can show that the minimization problem over the generator correspond to minimizing the Jensen-Shannon (JS) divergence between the true distribution  $\mathcal{D}_{real}$  and the generative distribution  $\mathcal{D}_G$ . Recall that for two distributions  $\mu$  and  $\nu$ , the JS divergence is defined by

$$d_{JS}(\mu, \nu) = \frac{1}{2}(KL(\mu \parallel \frac{\mu + \nu}{2}) + KL(\nu \parallel \frac{\mu + \nu}{2})).$$

Other measuring functions  $\phi$  and choice of discriminator class leads to different distance function between distribution other than JS divergence. Notably, Arjovsky et al. [2017] shows that

---

<sup>4</sup>Distance between distributions is often referred to as statistical distance. However, since statistical distance sometimes refers to the  $\ell_1$  (TV) distance between the distributions, we avoid using this term in this paper as much as possible.

when  $\phi(t) = t$ , and the discriminator is chosen among all 1-Lipschitz functions, maxing out the discriminator, the generator is attempting to minimize the Wasserstein distance between  $\mathcal{D}_{real}$  and  $D_u(h)$ . Recall that Wasserstein distance between  $\mu$  and  $\nu$  is defined as

$$d_W(\mu, \nu) = \sup_{D \text{ is 1-Lipschitz}} \left| \mathbb{E}_{x \sim \mu} [D(x)] - \mathbb{E}_{x \sim \nu} [D(x)] \right|. \quad (3)$$

### 3 Generalization theory for GANs

This interpretation of GANs in terms of minimizing distance (such as JS divergence and Wasserstein distance) between the real distribution and the generated distribution relies on two crucial assumptions: (i) very expressive class of discriminators such as the set of all bounded discriminator or the set of all 1-Lipschitz discriminators, and (ii) very large number of examples to compute/estimate the objective (1) or (2). Neither of these happens in practice, and we will show next that they do affect the generalization ability. a notion that we will introduce in Section 3.1.

One of the messages of our analysis will be that discriminators with bounded capacity perform very differently than the ideal (strong) discriminators analysed in Section 2. First, in Section 3.2 we show that the JS divergence and Wasserstein distance that resulted from strong discriminators (such as bounded or 1-Lipschitz functions) don't generalize, whereas in Section 3.3 we show that discriminator class with bounded number of parameters (such as neural nets) do generalize with relatively modest number of examples.

Moreover, even though discriminator with capacity  $p$  has good generalization power, there might be a potential diversity issue with weak discriminators. We will see (Corollary 3.2 in Section 3.4) that a discriminator of capacity  $p$  cannot distinguish too well between  $\mathcal{D}_{real}$  and the empirical distribution  $\hat{\mathcal{D}}_{real}$  when the number of samples  $m$  exceeds  $(p \log p)/\epsilon^2$ . This holds even we have access to infinite number of examples from  $\mathcal{D}_{real}$ . So this is not a question of "insufficient training samples," nor the usual worry of "overfitting." One way to view this result is that a bounded capacity discriminator is unable to force the generator to produce a distribution with very high diversity. We note that similar results have been shown before in study of pseudorandomness [Trevisan et al., 2009] and model criticism [Gretton et al., 2012].

#### 3.1 Definition of generalization

Let  $x_1, \dots, x_m$  be the training examples, and let  $\hat{\mathcal{D}}_{real}$  denote the uniform distribution over  $x_1, \dots, x_m$ . Similarly, let  $G_u(h_1), \dots, G_u(h_r)$  be a set of  $r$  examples from the generated distribution  $\mathcal{D}_G$ . In the training of GANs, one uses  $\mathbb{E}_{x \sim \hat{\mathcal{D}}_{real}} [\phi(D_v(x))]$  to approximate the quantity  $\mathbb{E}_{x \sim \mathcal{D}_{real}} [\phi(D_v(x))]$ . Inspired by the observation that GANs and its variants attempt to minimize some distance (or divergence)  $d(\cdot, \cdot)$  between  $\mathcal{D}_{real}$  and  $\mathcal{D}_G$  using finite samples, we define the generalization of GANs as follows:

We say a divergence or distance  $d(\cdot, \cdot)$  between distribution generalizes with  $m$  training examples and error  $\epsilon$  if for the learnt distribution  $\mathcal{D}_G$ , the following hold with high probability,

$$\left| d(\mathcal{D}_{real}, \mathcal{D}_G) - d(\hat{\mathcal{D}}_{real}, \hat{\mathcal{D}}_G) \right| \leq \epsilon \quad (4)$$

where  $\hat{\mathcal{D}}_{real}$  is an empirical version of the true distribution (with  $m$  samples) and  $\hat{\mathcal{D}}_G$  is an empirical version of the generated distribution with polynomial number of samples.

In words, generalization in GANs means that the population distance between the true and generated distribution is close to the empirical distance between the empirical distributions. Our target is to make the former distance small, whereas the latter one is what we can access and minimize in practice. We note that for generated distribution we only require polynomial number of examples because the training algorithm can generate polynomial number of samples by its own in polynomial time.

We also note that we intentionally didn't specify the quantifiers in front of equation (4). The strongest version of generalization — the counterpart of uniform convergence in supervised learning — would be that for all distribution  $\mathcal{D}_G$  equation (4) holds. A weaker version that takes the generator into account is that for all  $\mathcal{D}_G$  that is realizable by the family of generators equation (4) holds. One of the weakest versions would only concern about the learnt distribution  $\mathcal{D}_G$ . In the rest of the paper, we mostly use the first version unless otherwise specified.

### 3.2 JS divergence and Wasserstein distance don't generalize

As a warm-up, we show that JS divergence and Wasserstein distance don't generalize with any polynomial number of examples because the the population distance (divergence) is not reflected by the empirical distance.

**Lemma 1.** *Let  $\mu$  be uniform Gaussian distributions  $\mathcal{N}(0, \frac{1}{d}I)$  and  $\hat{\mu}$  be an empirical versions of  $\mu$  with  $m$  examples. Then we have*

$$\begin{aligned} d_{JS}(\mu, \hat{\mu}) &= \log 2 \\ d_W(\mu, \hat{\mu}) &\geq 1.1 \end{aligned}$$

There are two consequences of Lemma 1. First, consider the situation where  $\mathcal{D}_{real} = \mathcal{D}_G = \mu$ , then we have that  $d_W(\mathcal{D}_{real}, \mathcal{D}_G) = 0$  but  $d_W(\hat{\mathcal{D}}_{real}, \hat{\mathcal{D}}_G) > 1$  as long as we have polynomial number of examples. This violates the generalization definition equation (4).

Second, consider the case  $\mathcal{D}_{real} = \mu$  and  $\mathcal{D}_G = \hat{\mathcal{D}}_{real} = \hat{\mu}$ , that is,  $\mathcal{D}_G$  memorizes all of the training examples in  $\hat{\mathcal{D}}_{real}$ . In this case, since  $\mathcal{D}_G$  is a discrete distribution with finite supports, with enough (polynomial) examples, in  $\hat{\mathcal{D}}_G$ , effectively we also have that  $\hat{\mathcal{D}}_G \approx \mathcal{D}_G$ . Therefore, we have that  $d_W(\hat{\mathcal{D}}_{real}, \hat{\mathcal{D}}_G) \approx 0$  whereas  $d_W(\mathcal{D}_{real}, \mathcal{D}_G) > 1$ . In other words, with any polynomial number of examples, it's possible to overfit to the training examples using Wasserstein distance. The same argument also applies to JS divergence. See Theorem A.1 for a formal proof.

We also remark that the result in Lemma 1 holds even if we apply add small noise to the distribution  $\hat{\mu}$ . That is, if we obtain  $\tilde{\mu}$  by convolving  $\hat{\mu}$  with a Gaussian distribution  $\mathcal{N}(0, \frac{\sigma^2}{d}I)$  with  $\sigma < c/\sqrt{\log m}$  for some small enough constant  $c$ , then  $d_{JS}(\mu, \tilde{\mu}) > \log 2 - 1/m$ . See Appendix A.1 for details.

We remark that this result doesn't conflict with the experiment of Arjovsky et al. [2017] because empirically in the experiment, the paper uses a surrogate for the Wasserstein distance, which, as we will show later, indeed generalizes.

Finally, we note that generalization may not be the only thing that we should concern about in the setting of GANs (as opposed to the supervised learning setting). See Section 3.4 for more discussion.



### 3.3 Generalization bounds for neural net distance

Which distance measure between  $\mathcal{D}_{real}$  and  $\mathcal{D}_G$  the GAN objective is truly minimizing? Can we analyze the generalization performance with finite samples? Towards answering these questions we consider the following general distance measure that unifies the distance that unifies JS divergence, Wasserstein distance, and the neural net distance that we define later in this section.

**Definition 1** ( $\mathcal{F}$ -distance). Let  $\mathcal{F}$  be a class of functions from  $\mathbb{R}^d$  to  $[0, 1]$  and  $\phi$  be a concave measuring function. Then the  $\mathcal{F}$ -divergence with respect to  $\phi$  between two distribution  $\mu$  and  $\nu$  supported on  $\mathbb{R}^d$  is defined as

$$d_{\mathcal{F},\phi}(\mu, \nu) = \sup_{D \in \mathcal{F}} \left| \mathbb{E}_{x \sim \mu} [\phi(D(x))] + \mathbb{E}_{x \sim \nu} [\phi(1 - D(x))] \right| - 2\phi(1/2) \quad (5)$$

When  $\phi(t) = t$ , we have that  $d_{\mathcal{F},\phi}$  is a distance function (or technically, a pseudometric<sup>5</sup>), and with slightly abuse of notation we write it simply as

$$d_{\mathcal{F}}(\mu, \nu) = \sup_{D \in \mathcal{F}} \left| \mathbb{E}_{x \sim \mu} [D(x)] - \mathbb{E}_{x \sim \nu} [D(x)] \right|.$$

**Example 1.** When  $\phi(t) = \log(t)$  and  $\mathcal{F} = \{\text{all functions from } \mathbb{R}^d \text{ to } [0, 1]\}$ , we have that  $d_{\mathcal{F},\phi}$  is the same as JS divergence. When  $\phi(t) = t$  and  $\mathcal{F} = \{\text{all 1-Lipschitz functions from } \mathbb{R}^d \text{ to } [0, 1]\}$ , then  $d_{\mathcal{F},\phi}$  is the Wasserstein distance.

**Example 2.** Suppose  $\mathcal{F}$  is a set of neural networks and  $\phi(t) = \log t$ , then original GAN objective function is equivalent to

$$\min_G d_{\mathcal{F},\phi}(\hat{\mathcal{D}}_{real}, \hat{\mathcal{D}}_G).$$

Suppose  $\mathcal{F}$  is the set of neural networks, and  $\phi(t) = t$ , then the objective function used empirically in [Arjovsky et al. \[2017\]](#) is equivalent to

$$\min_G d_{\mathcal{F}}(\hat{\mathcal{D}}_{real}, \hat{\mathcal{D}}_G). \quad (6)$$

For simplicity, when  $\mathcal{F}$  is a neural net, we also refer  $d_{\mathcal{F}}$  to as the neural net distance.

In the next theorem, we address the generalization of GANs by showing that using a class of neural nets with  $p$  parameters, the GAN learning generalizes in the sense of equation (4) (with a uniform convergence) with relatively modest number of examples. We assume that the measuring function takes values in  $[-\Delta, \Delta]$  is  $L_\phi$ -Lipschitz. Further,  $\mathcal{F} = \{D_v, v \in \mathcal{V}\}$  is the class of discriminators that is  $L$ -Lipschitz with respect to the parameters  $v$ . As usual, we use  $p$  to denote the number of parameters in  $v$ .

**Theorem 3.1.** *In the setting of previous paragraph, let  $\mu, \nu$  be two distributions and  $\hat{\mu}, \hat{\nu}$  be empirical versions with at least  $m$  samples each. There is a universal constant  $c$  such that when  $m \geq \frac{cp\Delta^2 \log(LL_\phi p/\epsilon)}{\epsilon^2}$ , we have with probability at least  $1 - \exp(-p)$  over the randomness of  $\hat{\mu}$  and  $\hat{\nu}$ ,*

$$|d_{\mathcal{F},\phi}(\hat{\mu}, \hat{\nu}) - d_{\mathcal{F},\phi}(\mu, \nu)| \leq \epsilon.$$

<sup>5</sup>A pseudometric satisfies nonnegativity, symmetry and triangle inequality. A metric in addition needs to satisfy identity of indiscernibles in the sense that  $d(x, y) = 0$  if and only if  $x = y$ . This metric is also known as the integral probability metrics [[Müller, 1997](#)].

The proof (in Appendix A.1) uses standard concentration inequalities and a standard  $\epsilon$ -net argument: there aren't too many distinct discriminators, and thus given enough samples the expectation over the empirical distribution converges to the expectation over the true distribution for *all* discriminators.

Theorem 3.1 shows that the neural network divergence (and neural network distance) has a much better generalization bound than Jensen-Shannon divergence or Wasserstein distance. If the GAN successfully minimized the neural network divergence between the empirical distributions, that is,  $d(\hat{\mathcal{D}}_{real}, \hat{\mathcal{D}}_G)$ , then we know the neural network divergence  $d(\mathcal{D}_{real}, \mathcal{D}_G)$  between the distributions  $\mathcal{D}_{real}$  and  $\mathcal{D}_G$  is also small.

One would need to argue that this generalization continues to hold at every iteration of the training. While we can resample from  $\mathcal{D}_G$ , it is infeasible to get more fresh samples from  $\mathcal{D}_{real}$  in every iteration. The following corollary shows the generalization bound holds for every iteration as long as the number of iterations is not too large.

**Corollary 3.1.** *In the setting of Theorem 3.1, suppose  $G^{(1)}, G^{(2)}, \dots, G^{(T)}$  ( $\log t \ll d$ ) be the  $T$  generators in the  $T$  iterations of the training, and assume  $\log T \leq p$ . There is a some universal constant  $c$  such that when  $m \geq \frac{cp\Delta^2 \log(LL_\phi p/\epsilon)}{\epsilon^2}$ , with probability at least  $1 - \exp(-p)$ , for all  $t \in [T]$ ,*

$$\left| d_{\mathcal{F},\phi}(\mathcal{D}_{real}, \mathcal{D}_{G^{(t)}}) - d_{\mathcal{F},\phi}(\hat{\mathcal{D}}_{real}, \hat{\mathcal{D}}_{G^{(t)}}) \right| \leq \epsilon.$$

The key observation here is that the objective is separated into two parts and the generator is not directly related to  $\mathcal{D}_{real}$ . So even though we cannot resample real samples, the generalization bound still holds. Detailed proof appear in Appendix A.1.

### 3.4 Generalization vs Diversity

Note that the ability to generalize also comes with a cost (that might be necessary). For JS divergence and Wasserstein distance, when the distance between two distributions  $\mu, \nu$  is small, it is safe to conclude that the distributions  $\mu$  and  $\nu$  are almost the same. However, the neural net distance  $d_{NN}(\mu, \nu)$  can be small even if  $\mu, \nu$  are not very close. As a simple Corollary of Lemma 3.1, we obtain:

**Corollary 3.2** (Low-capacity discriminators cannot detect lack of diversity). *Let  $\hat{\mu}$  be the empirical version of distribution  $\mu$  with  $m$  samples. There is a some universal constant  $c$  such that when  $m \geq \frac{cp\Delta^2 \log(LL_\phi p/\epsilon)}{\epsilon^2}$ , we have that with high probability*

$$d_{\mathcal{F},\phi}(\mu, \hat{\mu}) \leq \epsilon.$$

That is, the neural network distance cannot distinguish between the real distribution  $\mu$  and an empirical distribution with roughly  $p/\epsilon^2$  samples. Thus the discriminator is incapable of detecting when the synthetic distribution has low diversity.

## 4 Expressive power and existence of equilibrium

Section 3 clarified the notion of generalization for GANs: namely, neural-net divergence between the generated distribution  $\mathcal{D}$  and  $\mathcal{D}_{real}$  on the empirical samples closely tracks the divergence on



the full distribution (i.e., unseen samples). But this doesn't explain why in practice the generator usually "wins" so that the discriminator is unable to do much better than random guessing at the end. In other words, was it sheer luck that so many real-life distributions  $\mathcal{D}_{real}$  turned out to be close in neural-net distance to a distribution produced by a fairly compact neural net? This section suggests no luck may be needed.

The explanation starts with a thought experiment. Imagine allowing a much more powerful generator, namely, an infinite mixture of deep nets, each of size  $p$ . So long as the deep net class is capable of generating simple gaussians, such mixtures are quite powerful, since a classical result says that an infinite mixtures of simple gaussians can closely approximate  $\mathcal{D}_{real}$ . Thus an infinite mixture of deep net generators will "win" the GAN game, not only against a discriminator that is a small deep net but also against more powerful discriminators (e.g., any Lipschitz function).

The next stage in the thought experiment is to imagine a much less powerful generator, which is a mix of only a few deep nets, not infinitely many. Simple counterexamples show that now the distribution  $\mathcal{D}$  will not closely approximate arbitrary  $\mathcal{D}_{real}$  with respect to natural metrics like  $\ell_p$ . Nevertheless, could the generator still win the GAN game against a deep net of bounded capacity (i.e., the deep net is unable to distinguish  $\mathcal{D}$  and  $\mathcal{D}_{real}$ )? We show it can.

**INFORMAL THEOREM:** *If the discriminator is a deep net with  $p$  parameters, then a mixture of  $\tilde{O}(p \log(p/\epsilon)/\epsilon^2)$  generator nets can produce a distribution  $\mathcal{D}$  that the discriminator will be unable to distinguish from  $\mathcal{D}_{real}$  with probability more than  $\epsilon$ . (Here  $\tilde{O}(\cdot)$  notation hides some nuisance factors.)*

This informal theorem is also a component of our result below about the existence of an approximate pure equilibrium. With current technique this existence result seems sensitive to the measuring function  $\phi$ , and works for  $\phi(x) = x$  (i.e., Wasserstein GAN). For other  $\phi$  we only show existence of mixed equilibria with small mixtures.

#### 4.1 General $\phi$ : Mixed Equilibrium

For general measuring function  $\phi$  we can only show the existence of a mixed equilibrium, where we allow the discriminator and generator to be finite mixtures of deep nets.

For a class of generators  $\{G_u, u \in \mathcal{U}\}$  and a class of discriminators  $\{D_v, v \in \mathcal{V}\}$ , we can define the payoff  $F(u, v)$  of the game between generator and discriminator

$$F(u, v) = \mathbb{E}_{x \sim \mathcal{D}_{real}} [\phi(D_v(x))] + \mathbb{E}_{x \sim \mathcal{D}_G} [\phi(1 - D_v(x))]. \quad (7)$$

Of course as we discussed in previous section, in practice these expectations should be with respect to the empirical distributions. Our discussions in this section does not depend on the distributions  $\mathcal{D}_{real}$  and  $\mathcal{D}_h$ , so we define  $F(u, v)$  this way for simplicity.

The well-known min-max theorem [v. Neumann, 1928] in game theory shows if both players are allowed to play *mixed strategies* then the game has a min-max solution. A mixed strategy for the generator is just a distribution  $\mathcal{S}_u$  supported on  $\mathcal{U}$ , and one for discriminator is a distribution  $\mathcal{S}_v$  supported on  $\mathcal{V}$ .

**Theorem 4.1** (vonNeumann). *There exists a value  $V$ , and a pair of mixed strategies  $(\mathcal{S}_u, \mathcal{S}_v)$  such that*

$$\forall v, \quad \mathbb{E}_{u \sim \mathcal{S}_u} [F(u, v)] \leq V \quad \text{and} \quad \forall u, \quad \mathbb{E}_{v \sim \mathcal{S}_v} [F(u, v)] \geq V.$$

Note that this equilibrium involves both parties announcing their strategies  $\mathcal{S}_u, \mathcal{S}_v$  at the start, such that neither will have any incentive to change their strategy after studying the opponent's strategy. The payoff is generated by the generator first sample  $u \sim \mathcal{S}_u, h \sim \mathcal{D}_h$ , and then generate an example  $x = G_u(h)$ . Therefore, the mixed generator is just a linear mixture of generators. The discriminator will first sample  $v \sim \mathcal{S}_v$ , and then output  $D_v(x)$ . Note that in general this is very different from a discriminator  $D$  that outputs  $\mathbb{E}_{v \sim \mathcal{S}_v}[D_v(x)]$ , because the measuring function  $\phi$  is in general nonlinear. In particular, the correct payoff function for a mixture of discriminator is:

$$\mathbb{E}_{v \sim \mathcal{S}_v} [F(u, v)] = \mathbb{E}_{\substack{x \sim \mathcal{D}_{real} \\ v \sim \mathcal{S}_v}} [\phi(D_v(x))] + \mathbb{E}_{\substack{h \sim \mathcal{D}_h \\ v \sim \mathcal{S}_v}} [\phi(1 - D_v(G_u(h)))].$$

Of course, this equilibrium involving an infinite mixture makes little sense in practice. We show that (as is folklore in game theory [Lipton and Young, 1994]) that we can *approximate* this min-max solution with mixture of finitely many generators and discriminators. More precisely we define  $\epsilon$ -approximate equilibrium:

**Definition 2.** A pair of mixed strategies  $(\mathcal{S}_u, \mathcal{S}_v)$  is an  $\epsilon$ -approximate equilibrium, if for some value  $V$

$$\begin{aligned} \forall v \in \mathcal{V}, \quad & \mathbb{E}_{u \sim \mathcal{S}_u} [F(u, v)] \leq V + \epsilon; \\ \forall u \in \mathcal{U}, \quad & \mathbb{E}_{v \sim \mathcal{S}_v} [F(u, v)] \geq V - \epsilon. \end{aligned}$$

If the strategies  $\mathcal{S}_u, \mathcal{S}_v$  are pure strategies, then this pair is called an  $\epsilon$ -approximate pure equilibrium.

Suppose  $\phi$  is  $L_\phi$ -Lipschitz and bounded in  $[-\Delta, \Delta]$ , the generator and discriminators are  $L$ -Lipschitz with respect to the parameters and  $L'$ -Lipschitz with respect to inputs, in this setting we can formalize the above Informal Theorem as follows:

**Theorem 4.2.** *In the settings above, there is a universal constant  $C > 0$  such that for any  $\epsilon$ , there exists  $T = \frac{C\Delta^2 p \log(LL'L_\phi p/\epsilon)}{\epsilon^2}$  generators  $G_{u_1}, \dots, G_{u_T}$  and  $T$  discriminators  $D_{v_1}, \dots, D_{v_T}$ , let  $\mathcal{S}_u$  be a uniform distribution on  $u_i$  and  $\mathcal{S}_v$  be a uniform distribution on  $v_i$ , then  $(\mathcal{S}_u, \mathcal{S}_v)$  is an  $\epsilon$ -approximate equilibrium. Furthermore, in this equilibrium the generator “wins,” meaning discriminators cannot do better than random guessing.*

The proof uses a standard probabilistic argument and epsilon net argument to show that if we sample  $T$  generators and discriminators from infinite mixture, they form an approximate equilibrium with high probability. For the second part, we use the fact that every distribution can be approximated by infinite mixture of Gaussians, so the generator must be able to approximate the real distribution  $\mathcal{D}_{real}$  and win. Therefore indeed a mixture of  $\tilde{O}(p)$  generators can achieve an  $\epsilon$ -approximate equilibrium.

#### 4.1.1 $\phi(x) = x$ : Pure Equilibrium

Now we consider the special case of Wasserstein-GAN, which is equivalent to setting  $\phi(x) = x$  in Equation (2). In this case, it is possible to augment the network structure, and achieve an approximate pure equilibrium for the GAN game for networks of size  $\tilde{O}(p^2)$ . This should be

interpreted as: if deep nets of size  $p$  are capable of generating a Gaussian, then the W-GAN game for neural networks of size  $\tilde{O}(p^2)$  has an approximate equilibrium in which the generator wins. (The theorem is stated for RELU gates but also holds for standard activations such as sigmoid.)

**Theorem 4.3.** *Suppose the generator and discriminator are both  $k$ -layer neural networks ( $k \geq 2$ ) with  $p$  parameters, and the last layer uses ReLU activation function. In the setting of Theorem 4.2, when  $\phi(x) = x$  there exists  $k + 1$ -layer neural networks of generators  $G$  and discriminator  $D$  with  $O\left(\frac{\Delta^2 p^2 \log(LL' L_\phi p/\epsilon)}{\epsilon^2}\right)$  parameters, such that there exists an  $\epsilon$ -approximate pure equilibrium. Furthermore, if the generator is capable of generating a Gaussian then the value  $V = 1$ .*

To prove this theorem, we consider the mixture of generators and discriminators as in Theorem 4.2, and show how to fold the mixture into a larger  $k + 1$ -layer neural network. We sketch the idea; details are in the supplementary.

**Mixture of Discriminators** Given a mixture of  $T$  discriminators  $D_{v_1}, \dots, D_{v_T}$ , we can just define  $D(x) = \frac{1}{T} \sum_{i=1}^T D_{v_i}(x)$ . Because  $\phi(x) = x$ , we know for any generator  $G_u$

$$\begin{aligned} \mathbb{E}_{x \sim \mathcal{D}_{real}} [D(x)] &= \mathbb{E}_{x \sim \mathcal{D}_{real}, i \in [T]} [D_{v_i}(x)] \\ \mathbb{E}_{h \sim \mathcal{D}_h} [(1 - D(G_u(h)))] &= \mathbb{E}_{h \sim \mathcal{D}_h, i \in [T]} [(1 - D_{v_i}(G_u(h)))] \end{aligned}$$

Therefore, the payoff for  $D$  is exactly the same as the payoff for the mixture of discriminators. Also, the discriminator  $D$  is easily implemented as a network  $T$  times as large as the original network by adding a top layer that averages the output of the  $T$  generators  $D_{v_i}(x)$ .

**Mixture of Generators** For mixture of generators, we construct a single neural network that approximately generates the mixture distribution using the gaussian input it has. To do that, we can pass the input  $h$  through all the generators  $G_{u_1}, G_{u_2}, \dots, G_{u_T}$ . We then show how to implement a “multi-way selector” that will select a uniformly random output from  $G_{u_i}(h)$  ( $i \in [T]$ ). The selector involves a simple 2-layer network that selects a number  $i$  from 1 to  $T$  with the appropriate probability and “disables” all the neural nets except the  $i$ th one by forwarding an appropriate large negative input.

Theorem 4.3 suggests that the objective of Wasserstein GAN may have approximate pure equilibrium for certain architectures of neural networks, which lends credence that Wasserstein GAN may be more robust.

*Remark:* In practice, GANs use highly structured deep nets, such as convolutional nets. Our current proof of existence of pure equilibrium requires introducing less structured elements in the net, namely, the multiway selectors that implement the mixture within a single net. It is left for future work whether pure equilibria exist for the original structured architectures. In the meantime, in practice we recommend using, even for W-GAN, a mixture of structured nets for GAN training, and it seems to help in our experiments reported below.

## 5 MIX+GANs

Theorem 4.2 and Theorem 4.3 show that using a mixture of (pot too many) generators and discriminators guarantees existence of approximate equilibrium. This suggests that using a mixture may lead to more stable training.

Of course, it is impractical to use very large mixtures, so we propose MIX + GAN: use a mixture of  $T$  components, where  $T$  is as large as allowed by size of GPU memory (usually  $T \leq 5$ ). Namely, train a mixture of  $T$  generators  $\{G_{u_i}, i \in [T]\}$  and  $T$  discriminators  $\{D_{v_i}, i \in [T]\}$  which share the same network architecture but have their own trainable parameters. Maintaining a mixture means of course maintaining a weight  $w_{u_i}$  for the generator  $G_{u_i}$  which corresponds to the probability of selecting the output of  $G_{u_i}$ . These weights are also updated via backpropagation. This heuristic can be combined with existing methods like DCGAN, W-GAN etc., giving us new training methods MIX+DCGAN, MIX+W-GAN etc.

We use exponentiated gradient [Kivinen and Warmuth, 1997]: store the log-probabilities  $\{\alpha_{u_i}, i \in [T]\}$ , and then obtain the weights by applying soft-max function on them:

$$w_{u_i} = \frac{e^{\alpha_{u_i}}}{\sum_{k=1}^T e^{\alpha_{u_k}}}, \quad i \in [T]$$

Note that our algorithm is maintaining weights on different generators and discriminators. This is very different from the idea of *boosting* where weights are maintained on samples. AdaGAN [Tolstikhin et al., 2017] uses ideas similar to boosting and maintains weights on training examples.

Given payoff function  $F$ , training MIX + GAN boils down to optimizing:

$$\begin{aligned} & \min_{\{u_i\}, \{\alpha_{u_i}\}} \max_{\{v_j\}, \{\alpha_{v_j}\}} \mathbb{E}_{i,j \in [T]} F(u_i, v_j) \\ &= \min_{\{u_i\}, \{\alpha_{u_i}\}} \max_{\{v_j\}, \{\alpha_{v_j}\}} \sum_{i,j \in [T]} w_{u_i} w_{v_j} F(u_i, v_j). \end{aligned}$$

Here the payoff function is the same as Equation (7). We use both measuring functions  $\phi(x) = \log x$  (for original GAN) and  $\phi(x) = x$  (for WassersteinGAN). In our experiments we alternatively update generators' and discriminators' parameters as well as their corresponding log-probabilities using ADAM [Kingma and Ba, 2015], with learning rate  $lr = 0.0001$ .

Empirically, it is observed that some components of the mixture tend to collapse and their weights diminish during the training. To encourage full use of the mixture capacity, we add to the training objective an entropy regularizer term that discourages the weights being too far away from uniform:

$$R_{ent}(\{w_{u_i}\}, \{w_{v_i}\}) = -\frac{1}{T} \sum_{i=1}^T (\log(w_{u_i}) + \log(w_{v_i}))$$

## 6 Experiments

In this section, we first explore the qualitative benefits of MIX+GAN on image generation tasks: MNIST dataset [LeCun et al., 1998] of hand-written digits and the CelebA [Liu et al., 2015] dataset of human faces. Then for more quantitative evaluation we use the CIFAR-10 dataset [Krizhevsky and Hinton, 2009] and use the *Inception Score* introduced in Salimans et al. [2016]. MNIST contains 60,000 labeled  $28 \times 28$ -sized images of hand-written digits, CelebA contains over 200K  $108 \times 108$ -sized images of human faces (we crop the center  $64 \times 64$  pixels for our experiments), and CIFAR-10 has 60,000 labeled  $32 \times 32$ -sized RGB natural images which fall into 10 categories.

Table 1: **Inception Scores on CIFAR-10.** Mixture of DCGANs achieves higher score than any single-component DCGAN does. All models except for WassersteinGAN variants are trained with labels.

| Method                                       | Score       |
|----------------------------------------------|-------------|
| SteinGAN [Wang and Liu, 2016]                | 6.35        |
| Improved GAN [Salimans et al., 2016]         | 8.09±0.07   |
| AC-GAN [Odena et al., 2016]                  | 8.25 ± 0.07 |
| S-GAN (best variant in [Huang et al., 2017]) | 8.59± 0.12  |
| DCGAN (as reported in Wang and Liu [2016])   | 6.58        |
| DCGAN (best variant in Huang et al. [2017])  | 7.16±0.10   |
| DCGAN (5x size)                              | 7.34±0.07   |
| MIX+DCGAN (Ours, with 5 components)          | 7.72±0.09   |
| Wasserstein GAN                              | 3.82±0.06   |
| MIX+WassersteinGAN (Ours, with 5 components) | 4.04±0.07   |
| Real data                                    | 11.24±0.12  |

To reinforce the point that this technique works out of the box, no extensive hyper-parameter search or tuning is necessary. Related code is public online at <https://github.com/yeezhang/MIX-plus-GAN>. Please refer to our code for hyper-parameters and experimental setup.

## 6.1 Qualitative Results

The DCGAN architecture [Radford et al., 2016] uses deep convolutional nets as generators and discriminators. We trained MIX + DCGAN on MNIST and CelebA using the authors’ code as a black box, and compared visual qualities of generated images vs DCGAN.

Results on MNIST is shown in Figure 2. In this experiment, the baseline DCGAN consists of a pair of a generator and a discriminator, which are 5-layer deconvoluitonal neural networks, and are conditioned on image labels. Our MIX+DCGAN model consists of a mixture of such DCGANs so that it has 3 generators and 3 discriminators. We observe that MIX + DCGAN produces somewhat cleaner digits than DCGAN (pote the fuzziness in the latter). Interestingly, each component of our mixture learns a slightly different style of strokes.

Figure 3 demonstrates results on CelebA dataset, using the same architecture as for MNIST, except the models are not conditioned on image labels anymore.

The MIX+DCGAN model generates more faithful and more diverse samples than the baseline DCGAN does on both datasets, even though one may need to zoom in to fully perceive the difference since the two datasets are rather easy for a powerful training like DCGAN.

## 6.2 Quantitative Results

Now we turn to quantitative measurement using Inception Score [Salimans et al., 2016]. Throughout, we use mixtures of 5 generators and 5 discriminators. We compare our MIX+DCGAN with DCGAN, and our MIX+Wasserstein with Wasserstein GAN. We note that at first sight the comparison DCGAN vs MIX + DCGAN seems unfair because the latter uses as much capacity as 5 DCGAN’s, with corresponding penalty in running time per epoch. To address, we also compare MIX+DCGAN

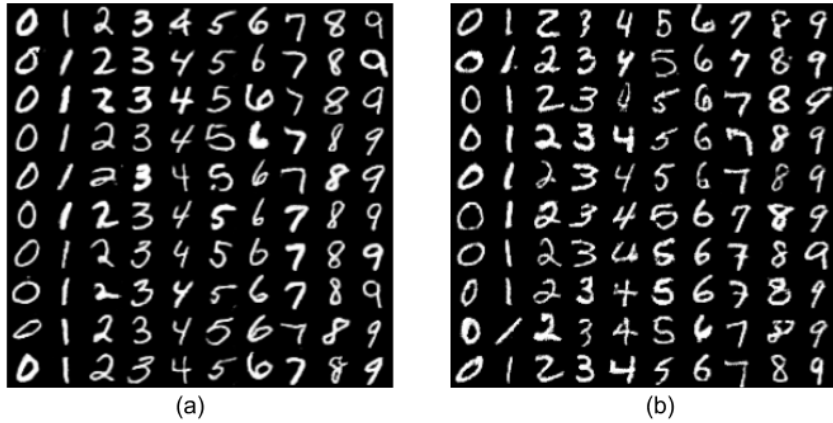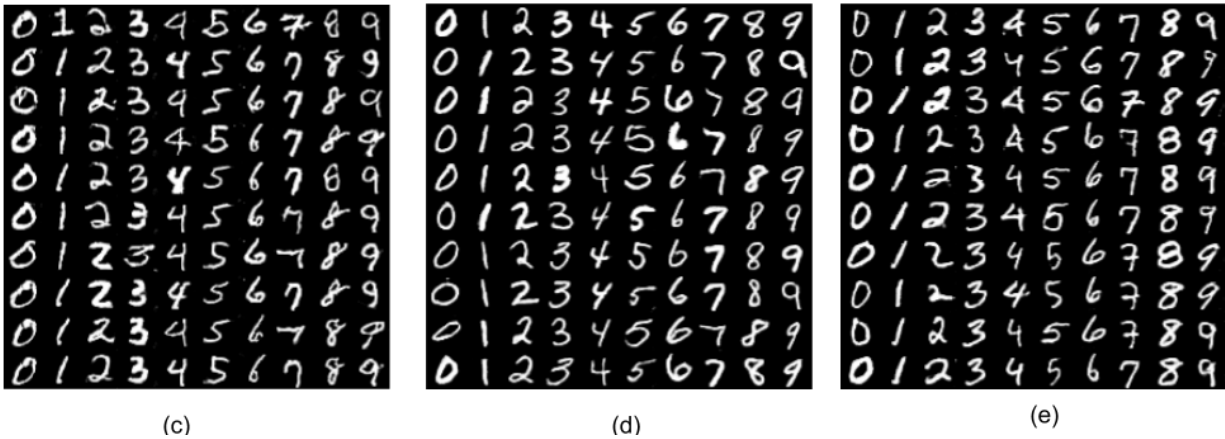

Figure 2: **MNIST Samples.** Digits generated from (a) MIX+DCGAN. (b) DCGAN. (c)-(d)-(e) From each of 3 components of MIX+DCGAN. (View on-screen with zooming in.)

with larger versions of DCGAN with roughly the same number of parameters, and we found the former is consistently better than the later, as shown below.

To construct MIX+DCGAN, we build on top of the DCGAN trained with losses proposed by Huang et al. [2017], namely adversarial loss, entropy loss and conditional loss, which is the best DCGAN so far without improved training techniques. The same hyper-parameters are used for fair comparison. See Huang et al. [2017] for more details. Similarly, for the MIX+WassersteinGAN, the base GAN is identical to that proposed by Arjovsky et al. [2017] using their hyper-parameter scheme.

Table 1 is a quantitative comparison between our mixture models and other state-of-the-art GAN models on the CIFAR-10 dataset, with inception score calculated using 50,000 freshly generated samples from each model that are not used in training. To sample a single image from our MIX+ models, we first select a generator from the mixture according to their assigned weights  $\{w_{u_i}\}$ , and then draw a sample from the selected generator. We find surprisingly that, simply by applying MIX+ to the baseline models, our MIX+ models achieve 7.72 v.s. 7.16 gain in the score on DCGAN, and 4.04 v.s. 3.82 gain on WassersteinGAN. To confirm that the superiority of MIX+ models is not solely due to more parameters, we observe that a DCGAN model that has 5



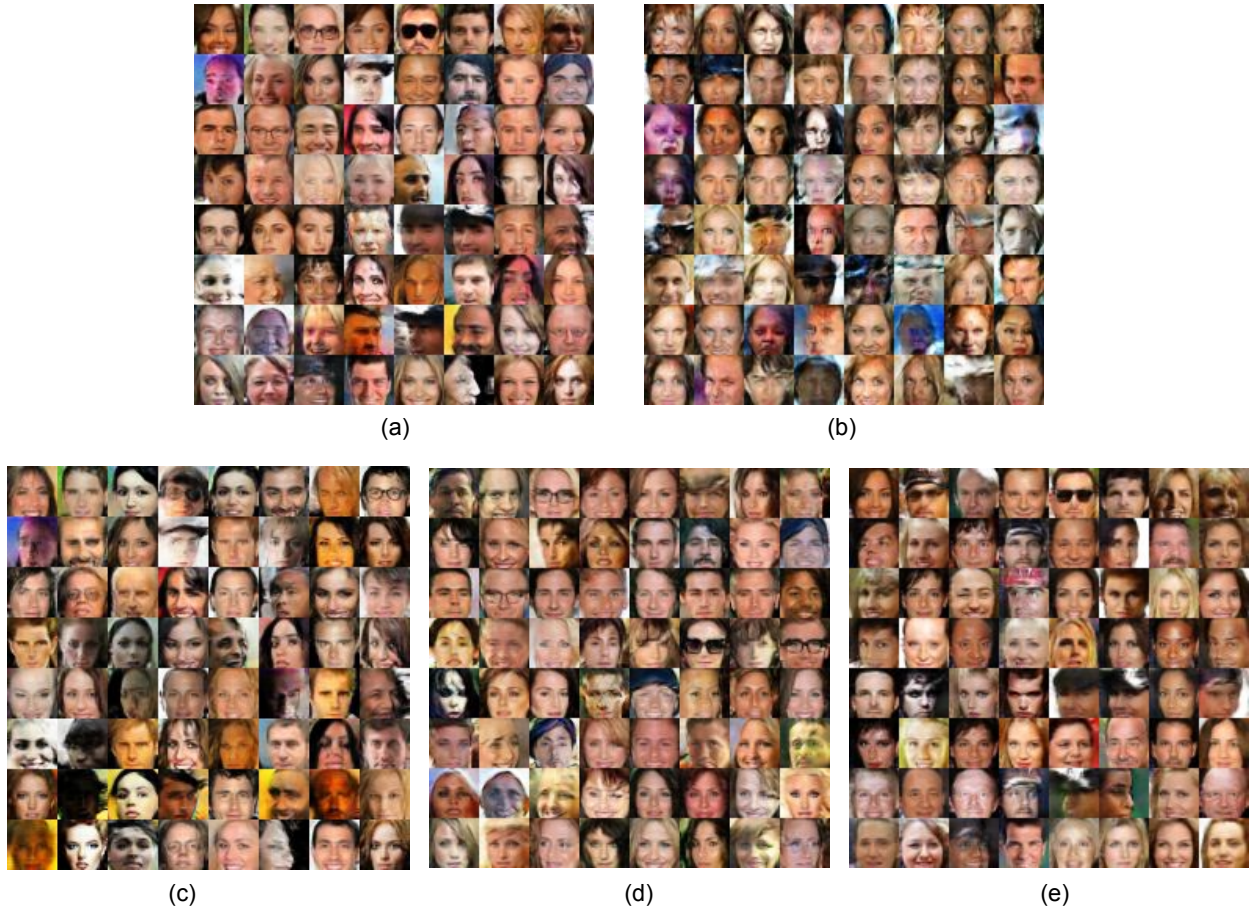

Figure 3: **CelebA Samples.** Faces generated from (a) MIX+DCGAN. (b) DCGAN.(c)-(d)-(e) Each of 3 components of MIX+DCGAN. (View on-screen with zooming in.)

times more parameters than the one mentioned above (roughly the same number of parameters as a 5-component MIX+DCGAN) gets only 7.34 (labeled as 5x size in Table 1), which is considerably lower than that of a MIX+DCGANs. The result of the 5 times larger DCGAN is tuned using a grid search over 27 sets of hyper-parameters including learning rates, dropout rates, and regularization weights.

Figure 4 shows how Inception Scores of MIX+DCGAN v.s. DCGAN evolve during training. MIX+DCGAN outperforms DCGAN throughout the entire training process, showing that it makes effective use of the additional capacity.

Arjovsky et al. [2017] shows that (approximated) Wasserstein loss, which is the neural network divergence by our definition, is meaningful because it correlates well with visual quality of generated samples. Figure 5 shows the training dynamics of neural network divergence of MIX+WassersteinGAN v.s. WassersteinGAN, which strongly indicates that MIX+WassersteinGAN is capable of achieving a much lower divergence as well as of improving the visual quality of generated samples.

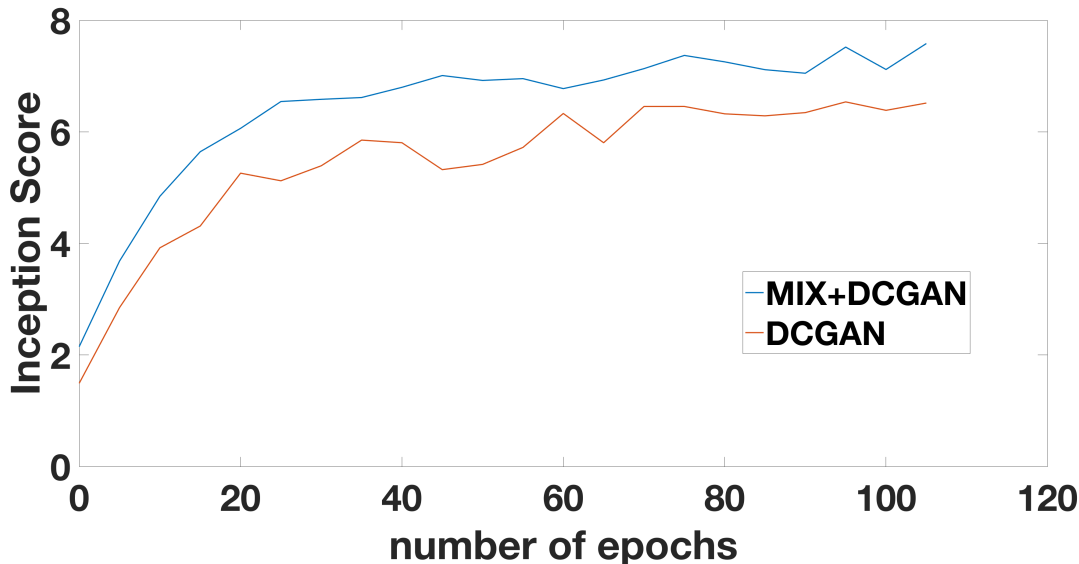

Figure 4: **MIX+DCGAN v.s. DCGAN Training Curve (Inception Score)**. MIX+DCGAN is consistently higher than DCGAN.

## 7 Conclusions

The notion of generalization for GANs has been clarified by introducing a new notion of distance between distributions, the neural net distance. (Whereas popular distances such as Wasserstein and JS may not generalize.) Assuming the visual cortex also is a deep net (or some network of moderate capacity) generalization with respect to this metric is in principle sufficient to make the final samples look realistic to humans.

One issue raised by our analysis is that the current GANs objectives cannot enforce that the synthetic distribution has high diversity. This cannot be fixed by simply providing the discriminator with more training examples. Possibly some other change to the GANs setup can fix this.

The paper also made progress on other unexplained issues about GANs, by showing that a pure approximate equilibrium exists for a certain natural training objective (Wasserstein) and in which the generator wins the game. No assumption about distribution  $\mathcal{D}_{real}$  is needed.

Suspecting that a pure equilibrium may not exist for all objectives, we recommend in practice our MIX+ GAN protocol using a small mixture of discriminators and generators. Our experiments show it improves the quality of several existing GAN training methods.

Finally, note that existence of an equilibrium does not imply that a simple algorithm (in this case, backpropagation) would find it easily. That still defies explanation.

## Acknowledgements

This paper was done in part while the authors were hosted by Simons Institute. We thank Moritz Hardt, Kunal Talwar, Luca Trevisan, and the referees for useful comments. This research was supported by NSF, Office of Naval Research, and the Simons Foundation.

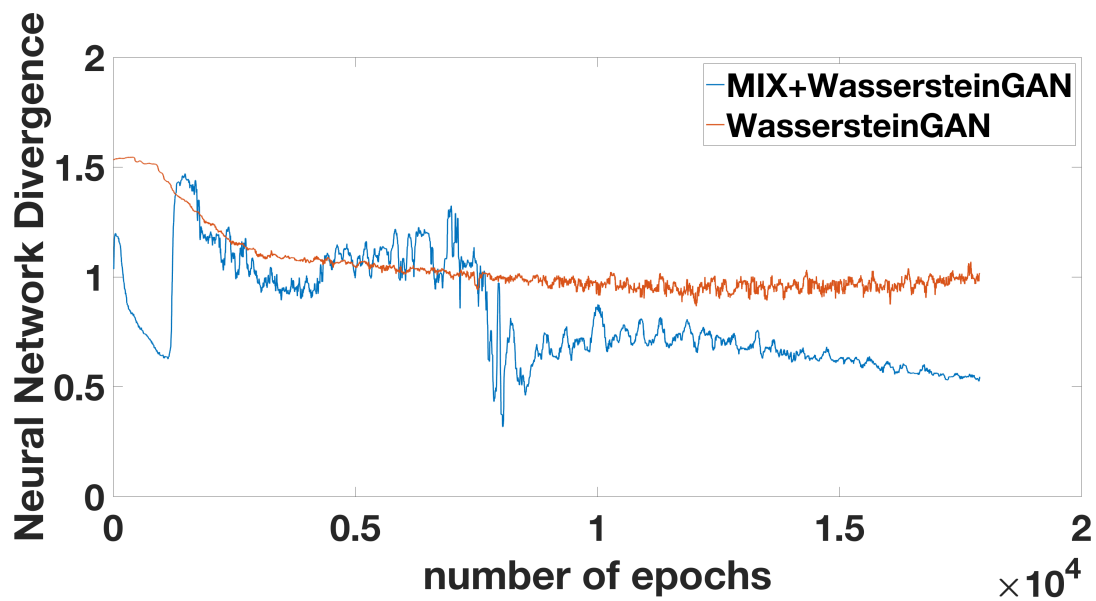

Figure 5: **MIX+WassersteinGAN v.s. WassersteinGAN Training Curve (Wasserstein Objective)**. MIX+WassersteinGAN is better towards the end but loss drops less smoothly, which needs further investigation.

## References

- Martín Abadi and David G Andersen. Learning to protect communications with adversarial neural cryptography. *arXiv preprint arXiv:1610.06918*, 2016.
- Martin Arjovsky, Soumith Chintala, and Léon Bottou. Wasserstein gan. *arXiv preprint arXiv:1701.07875*, 2017.
- I. Durugkar, I. Gemp, and S. Mahadevan. Generative Multi-Adversarial Networks. *ArXiv e-prints*, November 2016.
- Jayanta K Ghosh, RVJK Ghosh, and RV Ramamoorthi. Bayesian nonparametrics. Technical report, 2003.
- Ian Goodfellow. Nips 2016 tutorial: Generative adversarial networks. *arXiv preprint arXiv:1701.00160*, 2016.
- Ian Goodfellow, Jean Pouget-Abadie, Mehdi Mirza, Bing Xu, David Warde-Farley, Sherjil Ozair, Aaron Courville, and Yoshua Bengio. Generative adversarial nets. In *Advances in neural information processing systems*, pages 2672–2680, 2014.
- Arthur Gretton, Karsten M Borgwardt, Malte J Rasch, Bernhard Schölkopf, and Alexander Smola. A kernel two-sample test. *Journal of Machine Learning Research*, 13(Mar):723–773, 2012.
- Xun Huang, Yixuan Li, Omid Poursaeed, John Hopcroft, and Serge Belongie. Stacked generative adversarial networks. In *Computer Vision and Patter Recognition*, 2017.
- D. Jiwoong Im, H. Ma, C. Dongjoo Kim, and G. Taylor. Generative Adversarial Parallelization. *ArXiv e-prints*, December 2016.
- Diederik Kingma and Jimmy Ba. Adam: A method for stochastic optimization. In *International Conference on Learning Representations*, 2015.
- Jyrki Kivinen and Manfred K Warmuth. Exponentiated gradient versus gradient descent for linear predictors. *Information and Computation*, 132(1):1–63, 1997.
- Alex Krizhevsky and Geoffrey Hinton. Learning multiple layers of features from tiny images. Technical report, 2009.
- Yann LeCun, Corinna Cortes, and Christopher JC Burges. The mnist database of handwritten digits, 1998.
- Richard J Lipton and Neal E Young. Simple strategies for large zero-sum games with applications to complexity theory. In *Proceedings of the twenty-sixth annual ACM symposium on Theory of computing*, pages 734–740. ACM, 1994.
- Ziwei Liu, Ping Luo, Xiaogang Wang, and Xiaoou Tang. Deep learning face attributes in the wild. In *Proceedings of the IEEE International Conference on Computer Vision*, pages 3730–3738, 2015.
- Alfred Müller. Integral probability metrics and their generating classes of functions. *Advances in Applied Probability*, 29(02):429–443, 1997.

- Augustus Odena, Christopher Olah, and Jonathon Shlens. Conditional image synthesis with auxiliary classifier gans. *arXiv preprint arXiv:1610.09585*, 2016.
- Alec Radford, Luke Metz, and Soumith Chintala. Unsupervised representation learning with deep convolutional generative adversarial networks. In *International Conference on Learning Representations*, 2016.
- Tim Salimans, Ian Goodfellow, Wojciech Zaremba, Vicki Cheung, Alec Radford, and Xi Chen. Improved techniques for training gans. In *Advances in Neural Information Processing Systems*, 2016.
- Ilya Tolstikhin, Sylvain Gelly, Olivier Bousquet, Carl-Johann Simon-Gabriel, and Bernhard Schölkopf. Adagan: Boosting generative models. *arXiv preprint arXiv:1701.02386*, 2017.
- Luca Trevisan, Madhur Tulsiani, and Salil Vadhan. Regularity, boosting, and efficiently simulating every high-entropy distribution. In *Computational Complexity, 2009. CCC'09. 24th Annual IEEE Conference on*, pages 126–136. IEEE, 2009.
- J v. Neumann. Zur theorie der gesellschaftsspiele. *Mathematische annalen*, 100(1):295–320, 1928.
- Dilin Wang and Qiang Liu. Learning to draw samples: With application to amortized mle for generative adversarial learning. Technical report, 2016.

## A Omitted Proofs

In this section we give detailed proofs for the theorems in the main document.

### A.1 Omitted Proofs for Section 3

We first show that JS divergence and Wasserstein distances can lead to overfitting.

**Lemma 2** (Lemma 1 restated). *Let  $\mu$  be uniform Gaussian distributions  $\mathcal{N}(0, \frac{1}{d}I)$  and  $\hat{\mu}$  be an empirical versions of  $\mu$  with  $m$  examples. Then we have*

$$\begin{aligned} d_{JS}(\mu, \hat{\mu}) &= \log 2 \\ d_W(\mu, \hat{\mu}) &\geq 1.1 \end{aligned}$$

*Proof.* For Jensen-Shannon divergence, observe that  $\mu$  is a continuous distribution and  $\hat{\mu}$  is discrete, therefore  $d_{JS}(\mu, \hat{\mu}) = \log 2$ .

For Wasserstein distance, let  $x_1, x_2, \dots, x_m$  be the empirical samples (fixed arbitrarily). For  $y \sim \mathcal{N}(0, \frac{1}{d}I)$ , by standard concentration and union bounds, we have

$$\Pr[\forall i \in [m] \|y - x_i\| \geq 1.2] \geq 1 - m \exp(-\Omega(d)) \geq 1 - o(1).$$

Therefore, using the earth-mover interpretation of Wasserstein distance, we know  $d_W(\mu, \hat{\mu}) \geq 1.2 \Pr[\forall i \in [m] \|y - x_i\| \geq 1.2] \geq 1.1$ .  $\square$

Next we consider sampling for both the generated distribution and the real distribution, and show that the JS divergence or Wasserstein distance do not generalize.

**Theorem A.1.** *Let  $\mu, \nu$  be uniform Gaussian distributions  $\mathcal{N}(0, \frac{1}{d}I)$ . Suppose  $\hat{\mu}, \hat{\nu}$  are empirical versions of  $\mu, \nu$  with  $m$  samples. Then with probability at least  $1 - m^2 \exp(-\Omega(d))$  we have*

$$\begin{aligned} d_{JS}(\mu, \nu) &= 0, d_{JS}(\hat{\mu}, \hat{\nu}) = \log 2. \\ d_W(\mu, \nu) &= 0, d_W(\hat{\mu}, \hat{\nu}) \geq 1.1. \end{aligned}$$

*Further, let  $\tilde{\mu}, \tilde{\nu}$  be the convolution of  $\hat{\mu}, \hat{\nu}$  with a Gaussian distribution  $N(0, \frac{\sigma^2}{d}I)$ , as long as  $\sigma < \frac{c}{\sqrt{\log m}}$  for small enough constant  $c$ , we have with probability at least  $1 - m^2 \exp(-\Omega(d))$ .*

$$d_{JS}(\tilde{\mu}, \tilde{\nu}) > \log 2 - 1/m.$$

*Proof.* For the Jensen-Shannon divergence, we know with probability 1 the supports of  $\hat{\mu}, \hat{\nu}$  are disjoint, therefore  $d_{JS}(\hat{\mu}, \hat{\nu}) = 1$ .

For Wasserstein distance, note that for two random Gaussian vectors  $x, y \sim N(0, \frac{1}{d}I)$ , their difference is also a Gaussian with expected square norm 2. Therefore we have

$$\Pr[\|x - y\|^2 \leq 2 - \epsilon] \leq \exp(-\Omega(\epsilon^2 d)).$$

As a result, setting  $\epsilon$  to be a fixed constant (0.1 suffices), with probability  $1 - m^2 \exp(-\Omega(d))$ , we can union bound over all the  $m^2$  pairwise distances for points in support of  $\hat{\mu}$  and support of  $\hat{\nu}$ . With high probability, the closest pair between  $\hat{\mu}$  and  $\hat{\nu}$  has distance at least 1, therefore the Wasserstein distance  $d_W(\hat{\mu}, \hat{\nu}) \geq 1.1$ .



Finally we prove that even if we add noise to the two distributions, the JS divergence is still large. For distributions  $\tilde{\mu}, \tilde{\nu}$ , let  $\rho_1, \rho_2$  be their density functions. Let  $g(x) = \rho_1(x) \log \frac{2\rho_1(x)}{\rho_1(x) + \rho_2(x)} + \rho_2(x) \log \frac{2\rho_2(x)}{\rho_1(x) + \rho_2(x)}$ , we can rewrite the JS divergence as

$$d_{JS}(\tilde{\mu}, \tilde{\nu}) = \int \frac{1}{2} g(x) dx.$$

Let  $z_x$  be a Bernoulli variable with probability  $\rho_1(x)/(\rho_1(x) + \rho_2(x))$  of being 1. Note that  $g(x) = (\rho_1(x) + \rho_2(x))(\log 2 - H(z_x))$  where  $H(z_x)$  is the entropy of  $z_x$ . Therefore  $0 \leq g(x) \leq (\rho_1(x) + \rho_2(x)) \log 2$ . Let  $\mathcal{X}$  be the union of radius-0.2 balls near the  $2m$  samples in  $\hat{\mu}$  and  $\hat{\nu}$ . Since with high probability, all these samples have pairwise distance at least 1, by Gaussian density function we know (a) the balls do not intersect; (b) within each ball  $\frac{\max\{d_1(x), d_2(x)\}}{\min\{d_1(x), d_2(x)\}} \geq m^2$ ; (c) the union of these balls take at least  $1 - 1/2m$  fraction of the density in  $(\hat{\mu} + \hat{\nu})/2$ .

Therefore for every  $x \in \mathcal{X}$ , we know  $H(z_x) \leq o(1/m)$ , therefore

$$\begin{aligned} d_{JS}(\tilde{\mu}, \tilde{\nu}) &= \int \frac{1}{2} g(x) dx \\ &\geq \int_{x \in \mathcal{X}} \frac{1}{2} g(x) dx \\ &\geq \int_{x \in \mathcal{X}} (\rho_1(x) + \rho_2(x)) (\log 2 - o(1/m)) dx \\ &\geq \log 2 - 1/2m - o(1/m) \geq \log 2 - 1/m. \end{aligned}$$

□

Next we prove the neural network distance does generalize, given enough samples. Let us first recall the settings here: we assume that the measuring function takes values in  $[-\Delta, \Delta]$  is  $L_\phi$ -Lipschitz. Further,  $\mathcal{F} = \{D_v, v \in \mathcal{V}\}$  is the class of discriminators that is  $L$ -Lipschitz with respect to the parameters  $v$ . As usual, we use  $p$  to denote the number of parameters in  $v$ .

**Theorem A.2** (Theorem 3.1 restated). *In the setting described in the previous paragraph, let  $\mu, \nu$  be two distributions and  $\hat{\mu}, \hat{\nu}$  be empirical versions with at least  $m$  samples each. There is a universal constant  $c$  such that when  $m \geq \frac{cp\Delta^2 \log(LL_\phi p/\epsilon)}{\epsilon^2}$ , we have with probability at least  $1 - \exp(-p)$  over the randomness of  $\hat{\mu}$  and  $\hat{\nu}$ ,*

$$|d_{\mathcal{F}, \phi}(\hat{\mu}, \hat{\nu}) - d_{\mathcal{F}, \phi}(\mu, \nu)| \leq \epsilon.$$

*Proof.* The proof uses concentration bounds. We show that with high probability, for every discriminator  $D_v$ ,

$$|\mathbb{E}_{x \sim \hat{\mu}} [\phi(D_v(x))] - \mathbb{E}_{x \sim \mu} [\phi(D_v(x))]| \leq \epsilon/2, \quad (8)$$

$$|\mathbb{E}_{x \sim \hat{\nu}} [\phi(1 - D_v(x))] - \mathbb{E}_{x \sim \nu} [\phi(1 - D_v(x))]| \leq \epsilon/2. \quad (9)$$

If  $d_{\mathcal{F},\phi}(\mu, \nu) = t$ , let  $D_v$  be the optimal discriminator, we then have

$$\begin{aligned}
d_{\mathcal{F},\phi}(\mu, \nu) &\geq \mathbb{E}_{x \sim \hat{\mu}}[\phi(D_v(x))] + \mathbb{E}_{x \sim \hat{\nu}}[\phi(D_v(x))] \\
&\geq \mathbb{E}_{x \sim \mu}[\phi(D_v(x))] + \mathbb{E}_{x \sim \nu}[\phi(D_v(x))] \\
&\quad - \left| \mathbb{E}_{x \sim \mu}[\phi(D_v(x))] - \mathbb{E}_{x \sim \hat{\mu}}[\phi(D_v(x))] \right| \\
&\quad - \left| \mathbb{E}_{x \sim \nu}[\phi(1 - D_v(x))] - \mathbb{E}_{x \sim \hat{\nu}}[\phi(1 - D_v(x))] \right| \\
&\geq t - \epsilon.
\end{aligned}$$

The other direction is similar.

Now we prove the claimed bounds (8) (proof of (9) is identical). Let  $\mathcal{X}$  be a finite set such that every point in  $\mathcal{V}$  is within distance  $\epsilon/8LL_\phi$  of a point in  $X$  (a so-called  $\epsilon/8LL_\phi$ -net). Standard constructions give an  $X$  satisfying  $\log |\mathcal{X}| \leq O(p \log(LL_\phi p/\epsilon))$ . For every  $v \in \mathcal{X}$ , by Chernoff bound we know

$$\Pr\left[\left| \mathbb{E}_{x \sim \mu}[\phi(D_v(x))] - \mathbb{E}_{x \sim \hat{\mu}}[\phi(D_v(x))] \right| \geq \frac{\epsilon}{4}\right] \leq 2 \exp\left(-\frac{\epsilon^2 m}{2\Delta^2}\right).$$

Therefore, when  $m \geq \frac{Cp\Delta^2 \log(LL_\phi p/\epsilon)}{\epsilon^2}$  for large enough constant  $C$ , we can union bound over all  $v \in \mathcal{X}$ . With high probability (at least  $1 - \exp(-p)$ ), for all  $v \in \mathcal{X}$  we have  $|\mathbb{E}_{x \sim \mu}[\phi(D_v(x))] - \mathbb{E}_{x \sim \hat{\mu}}[\phi(D_v(x))]| \geq \frac{\epsilon}{4}$ .

Now, for every  $v \in \mathcal{V}$ , we can find a  $v' \in \mathcal{X}$  such that  $\|v - v'\| \leq \epsilon/8LL_\phi$ . Therefore

$$\begin{aligned}
&\left| \mathbb{E}_{x \sim \mu}[\phi(D_v(x))] - \mathbb{E}_{x \sim \hat{\mu}}[\phi(D_v(x))] \right| \\
&\leq \left| \mathbb{E}_{x \sim \mu}[\phi(D_{v'}(x))] - \mathbb{E}_{x \sim \hat{\mu}}[\phi(D_{v'}(x))] \right| \\
&\quad + \left| \mathbb{E}_{x \sim \mu}[\phi(D_{v'}(x))] - \mathbb{E}_{x \sim \mu}[\phi(D_v(x))] \right| \\
&\quad + \left| \mathbb{E}_{x \sim \hat{\mu}}[\phi(D_{v'}(x))] - \mathbb{E}_{x \sim \hat{\mu}}[\phi(D_v(x))] \right| \\
&\leq \epsilon/4 + \epsilon/8 + \epsilon/8 \\
&\leq \epsilon/2.
\end{aligned}$$

This finishes the proof of (8). □

Finally, we generalize the above Theorem to hold for *all* generators in a family.

**Corollary A.1** (Corollary 3.1 restated). *In the setting of Theorem 3.1, suppose  $G^{(1)}, G^{(2)}, \dots, G^{(T)}$  be the  $T$  generators in the  $T$  iterations of the training, and assume  $\log T \leq p$ . There is a some universal constant  $c$  such that when  $m \geq \frac{cp\Delta^2 \log(LL_\phi p/\epsilon)}{\epsilon^2}$ , with probability at least  $1 - \exp(-p)$ , for all  $t \in [T]$ ,*

$$\left| d_{\mathcal{F},\phi}(\mathcal{D}_{real}, \mathcal{D}_{G^{(t)}}) - d_{\mathcal{F},\phi}(\hat{\mathcal{D}}_{real}, \hat{\mathcal{D}}_{G^{(t)}}) \right| \leq \epsilon.$$

*Proof.* This follows from the proof of Theorem 3.1. Note that we have fresh samples for every generator distribution, so Equation (9) is true with high probability by union bound. For the real distribution, notice that Equation (8) does not depend on the generator, so it is also true with high probability. □

## A.2 Omitted Proof for Section 4: Expressive power and existence of equilibrium

**Mixed Equilibrium** We first show there is a finite mixture of generators and discriminators that approximates the equilibrium of infinite mixtures.

Again we recall the settings here: suppose  $\phi$  is  $L_\phi$ -Lipschitz and bounded in  $[-\Delta, \Delta]$ , the generator and discriminators are  $L$ -Lipschitz with respect to the parameters and  $L'$ -Lipschitz with respect to inputs.

**Theorem A.3** (Theorem 4.2 restated). *In the settings described in the previous paragraph, there is a large enough constant  $C > 0$  such that for any  $\epsilon$ , there exists  $T = \frac{C\Delta^2 p \log(LL'L_\phi \cdot p/\epsilon)}{\epsilon^2}$  generators  $G_{u_1}, \dots, G_{u_T}$  and  $T$  discriminators  $D_{v_1}, \dots, D_{v_T}$ , let  $\mathcal{S}_u$  be a uniform distribution on  $u_i$  and  $\mathcal{S}_v$  be a uniform distribution on  $v_i$ , then  $(\mathcal{S}_u, \mathcal{S}_v)$  is an  $\epsilon$ -approximate equilibrium.*

*Further, if the class of generator can generate a Gaussian, and the class of discriminator includes constant functions, then the value of the game  $V = 2\phi(1/2)$  (where  $\phi$  is the connection function in (2)).*

*Proof.* Let  $(\mathcal{S}'_u, \mathcal{S}'_v)$  be the pair of optimal mixed strategies as in Theorem 4.1 and  $V$  be the optimal value. We will show that randomly sampling  $T$  generators and discriminators from these two distributions gives the desired mixture with high probability.

Construct  $\epsilon/4LL'L_\phi$ -nets  $U, V$  for  $\mathcal{U}$  and  $\mathcal{V}$ . By standard construction, the sizes of these  $\epsilon$ -nets satisfy  $\log(|U| + |V|) \leq C'n \log(LL'L_\phi \cdot p/\epsilon)$  for some constant  $C'$ . Let  $u_1, u_2, \dots, u_T$  be independent samples from  $\mathcal{D}_u$ , and  $v_1, v_2, \dots, v_T$  be independent samples from  $\mathcal{D}_v$ . By Chernoff bound, for any  $u \in U$ , we know

$$\Pr\left[\mathbb{E}_{i \in [T]} [F(u, v_i)] \leq \mathbb{E}_{v \in \mathcal{V}} [F(u, v)] - \epsilon/2\right] \leq \exp\left(-\frac{\epsilon^2 T}{2\Delta^2}\right).$$

When  $T = \frac{C\Delta^2 p \log(LL'L_\phi \cdot p/\epsilon)}{\epsilon^2}$  and the constant  $C$  is large enough ( $C \geq 2C'$ ), with high probability this inequality is true for all  $u \in U$ . Now, for any  $u \in \mathcal{U}$ , let  $u'$  be the closest point in the  $\epsilon$ -net. By the construction of the net,  $\|u - u'\| \leq \epsilon/4LL'L_\phi$ . It is easy to check that  $F(u, v)$  is  $2LL'L_\phi$ -Lipschitz in both  $u$  and  $v$ , therefore

$$\mathbb{E}_{i \in [T]} [F(u', v_i)] \geq \mathbb{E}_{i \in [T]} [F(u, v_i)] - \epsilon/2.$$

Combining the two inequalities we know for any  $u' \in \mathcal{U}$ ,

$$\mathbb{E}_{i \in [T]} [F(u', v_i)] \geq V - \epsilon.$$

This finishes the proof for the second inequality. The proof for the first inequality is identical. By probabilistic argument we know there must exist such generators and discriminators.

Finally, we prove the fact that the value  $V$  must be equal to  $2\phi(1/2)$ . For the discriminator, one strategy is to just output  $1/2$ . This strategy has payoff  $2\phi(1/2)$  no matter what the generator does, so  $V \geq 2\phi(1/2)$ . For the generator, consider the distribution  $\mathcal{D}_\zeta = \mathcal{D}_{real} + \zeta N(0, I)$ , which is the convolution of  $\mathcal{D}_{real}$  and a Gaussian of variance  $\zeta I$ . For any  $\zeta$ ,  $\mathcal{D}_\zeta$  can be expressed as a infinite mixture of Gaussians and is therefore a mixed strategy of the generator. The Wasserstein distance between  $\mathcal{D}_\zeta$  and  $\mathcal{D}_{real}$  is  $O(\zeta)$ . Since the discriminator is  $L'$ -Lipschitz, it cannot distinguish between  $\mathcal{D}_\zeta$  and  $\mathcal{D}_{real}$ . In particular we know for any discriminator  $D_v$

$$\left| \mathbb{E}_{x \sim \mathcal{D}_\zeta} [\phi(1 - D_v(x))] - \mathbb{E}_{x \sim \mathcal{D}_{real}} [\phi(1 - D_v(x))] \right| \leq O(L_\phi L' \zeta).$$

Therefore,

$$\begin{aligned}
& \max_{v \in \mathcal{V}} \mathbb{E}_{x \sim \mathcal{D}_{real}} [\phi(D_v(x))] + \mathbb{E}_{x \sim \mathcal{D}_\zeta} [\phi(1 - D_v(x))] \\
& \leq O(L_\phi L' \zeta) + \max_{v \in \mathcal{V}} \mathbb{E}_{x \sim \mathcal{D}_{real}} [\phi(D_v(x)) + \phi(1 - D_v(x))] \\
& \leq 2\phi(1/2) + O(L_\phi L' \zeta).
\end{aligned}$$

Here the last step uses the assumption that  $\phi$  is concave. Therefore the value is upperbounded by  $V \leq 2\phi(1/2) + O(L_\phi L' \zeta)$  for any  $\zeta$ . Taking limit of  $\zeta$  to 0, we have  $V = 2\phi(1/2)$ .  $\square$

**Pure equilibrium** Now we show for Wasserstein objective, there exists an approximate pure equilibrium

**Theorem A.4** (Theorem 4.3 restated). *Suppose the generator and discriminator are both  $k$ -layer neural networks ( $k \geq 2$ ) with  $p$  parameters, and the last layer uses ReLU activation function. In the setting of Theorem 4.2 there exists  $k + 1$ -layer neural networks of generators  $G$  and discriminator  $D$  with  $O\left(\frac{\Delta^2 p^2 \log(LL'L_\phi \cdot p/\epsilon)}{\epsilon^2}\right)$  parameters, such that there exists an  $\epsilon$ -approximate pure equilibrium. Furthermore, if the generator is capable of generating a Gaussian then the value  $V = 1$ .*

In order to prove this theorem, the major step is to construct a generator that works as a mixture of generators.

**Mixture of Generators** For mixture of generators, we need to construct a single neural network that approximately generates the mixture distribution using the gaussian input it has. To do that, we can pass the input  $h$  through all the generators  $G_{u_1}, G_{u_2}, \dots, G_{u_T}$ . We then show how to implement a “multi-way selector” that will select a uniformly random output from  $G_{u_i}(h)$  ( $i \in [T]$ ).

In order to do that, we first observe that it is possible to compute a step function using a two layer neural network. This is fairly standard for many activation functions.

**Lemma 3.** *Fix an arbitrary  $q \in \mathcal{N}$  and  $z_1 < z_2 < \dots < z_q$ . For any  $0 < \delta < \min\{z_{i+1} - z_i\}$ , there is a two-layer neural network with a single input  $h \in \mathbb{R}$  that outputs  $q + 1$  numbers  $x_1, x_2, \dots, x_{q+1}$  such that (i)  $\sum_{i=1}^{q+1} x_i = 1$  for all  $h$ ; (ii) when  $h \in [z_{i-1} + \delta/2, z_i - \delta/2]$ ,  $x_i = 1$  and all other  $x_j$ 's are 0<sup>6</sup>.*

*Proof.* Using a two layer neural network, we can compute the function  $f_i(h) = \max\{\frac{h - z_i - \delta/2}{\delta}, 0\} - \max\{\frac{h - z_i + \delta/2}{\delta}, 0\}$ . This function is 0 for all  $h < z_i - \delta/2$ , 1 for all  $h \geq z_i + \delta/2$  and change linearly in between. Now we can write  $x_1 = 1 - f_1(h)$ ,  $x_{q+1} = f_q(h)$ , and for all  $i = 2, 3, \dots, q$ ,  $x_q = f_i(h) - f_{i-1}(h)$ . It is not hard to see that these functions satisfy our requirements.  $\square$

Using these step functions, we can essentially select one output from the  $T$  generators.

**Lemma 4.** *In the setting of Theorem 4.3, for any  $\delta > 0$ , there is a  $k + 1$ -layer neural network with  $O\left(\frac{\Delta^2 p^2 \log(LL'L_\phi \cdot p/\epsilon)}{\epsilon^2}\right)$  parameters that can generate a distribution that is within  $\delta$  total variational difference with the mixture of  $G_{u_1}, G_{u_2}, \dots, G_{u_T}$ .*

<sup>6</sup>When  $h \leq z_1 - \delta/2$  only  $x_1$  is 1 and when  $h \geq z_q + \delta/2$  only  $x_{q+1} = 1$

The idea is simple: since we have implemented step functions from Lemma 3, we can just pass through the input through all the generators  $G_{u_1}, \dots, G_{u_T}$ . For the last layer of  $G_{u_i}$ , we add a large multiple of  $-(1 - x_i)$  where  $x_i$  is the  $i$ -th output from the network in Lemma 3. Clearly, if  $x_i = 0$  this is going to effectively disable the neural network; if  $x_i = 1$  this will have no effect. By properties of  $x_i$ 's we know most of the time only one  $x_i = 1$ , hence only one generator is selected.

*Proof.* Suppose the input for the generator is  $(h_0, h) \sim N(0, 1) \times \mathcal{D}_h$  (i.e.  $h_0$  is sampled from a Gaussian,  $h$  is sampled according to  $\mathcal{D}_h$  independently). We pass the input  $h$  through the generators and gets outputs  $G_{u_i}(h)$ , then we use  $h_0$  to select one as the true output.

Let  $z_1, z_2, \dots, z_{T-1}$  be real numbers that divides the probability density of a Gaussian into  $T$  equal parts. Pick  $\delta' = \delta/100T$  in Lemma 3, we know there is a 2-layer neural network that computes step functions  $x_1, \dots, x_T$ . Moreover, the probability that  $(x_1, \dots, x_T)$  has more than 1 nonzero entry is smaller than  $\delta$ . Now, for the output of  $G_{u_i}(h)$ , in each output ReLU gate, we add a very large multiple of  $-(1 - x_i)$  (larger than the maximum possible output). This essentially “disables” the output when  $x_i = 0$  because before the result before ReLU is always negative. On the other hand, when  $x_i = 1$  this preserves the output. Call the modified network  $\hat{G}_{u_i}$ , we know  $\hat{G}_{u_i} = G_{u_i}$  when  $x_i = 1$  and  $\hat{G}_{u_i} = 0$  when  $x_i = 0$ . Finally we add a layer that outputs the sum of  $\hat{G}_{u_i}$ . By construction we know when  $(x_1, \dots, x_T)$  has only one nonzero entry, the network correctly outputs the corresponding  $G_{u_i}(x_i)$ . The probability that this happens is at least  $1 - \delta$  so the total variational distance with the mixture is bounded by  $\delta$ .  $\square$

Using the generator and discriminators we constructed, it is not hard to prove Theorem 4.3. The only thing to notice here is that when the generator is within  $\delta$  total variational distance to the true mixture, the payoff  $F(u, v)$  can change by at most  $2\Delta\delta$ .

*Proof of Theorem 4.3.* Let  $T$  be large enough so that there exists an  $\epsilon/2$ -approximate mixed equilibrium. Let the new set of discriminators be the convex combination of  $T$  discriminators  $\{D_v, v \in \mathcal{V}\}$ . Let the new set of generators be constructed as in Lemma 4 with  $\delta \leq \epsilon/4\Delta$  and  $G_{u_1}, \dots, G_{u_T}$  from the original set of generators. Let  $D$  be the discriminator which is the average of the  $T$  discriminators from the approximate mixed equilibrium, and  $G$  be the generator constructed by the  $T$  generators from the approximate mixed equilibrium. Define  $F^*(G, D)$  be the payoff of the new two-player game. Now, for any discriminator  $D'$ , think of it as a distribution of  $G_v$ , we know

$$\begin{aligned} F^*(G, D') &\geq \mathbb{E}_{i \in [T], v \in D'} F(u_i, v) \\ &\quad - |F^*(G, D') - \mathbb{E}_{i \in [T], v \in D'} F(u_i, v)| \\ &\geq V - \epsilon/2 - 2\Delta \frac{\epsilon}{4\Delta} \\ &\geq V - \epsilon. \end{aligned}$$

The bound from the first term comes from Theorem 4.2, and the fact that the expectation is smaller than the max. The bound for the second term comes from the fact that changing a  $\delta$  fraction of probability mass can change the payoff  $F$  by at most  $2\Delta\delta$ .

Similarly, for any generator  $G'$ , we know it is close to a mixture of generators  $G_u$ , therefore

$$\begin{aligned}
F^*(G', D) &\leq \mathbb{E}_{i \in [T], u \in G'} F(u, v_i) \\
&\quad + |F^*(G', D) - \mathbb{E}_{i \in [T], u \in G'} F(u, v_i)| \\
&\leq V + \epsilon/2 + 2\Delta \frac{\epsilon}{4\Delta} \\
&\leq V + \epsilon.
\end{aligned}$$

This finishes the proof.  $\square$

## B Examples when best response fail

In this section we construct simple generators and discriminators and show that if both generators and discriminators are trained to optimal with respect to Equation (2), the solution will cycle and cannot converge. For simplicity, we will show this when the connection function is  $\phi$ , but it is possible to show similar result even when  $\phi$  is the traditional log function.

We consider a simple example where we try to generate points on a circle. The true distribution  $\mathcal{D}_{true}$  has 1/3 probability to generate a point at angle  $0, 2\pi/3, 4\pi/3$ . Let us first consider a case when the generator does not have enough capacity to generate the true distribution.

**Definition 3** (Example 1). The generator  $G$  has one parameter  $\theta \in [0, 2\pi)$ , and always generates a point at angle  $\theta$ . The discriminator  $D$  has a parameter  $\phi \in [0, 2\pi)$ , and  $D_\phi(\tau) = \exp(-10d(\tau, \phi)^2)$ . Here  $d(\tau, \phi)$  is the angle between  $\tau$  and  $\phi$  and is always between  $[0, \pi]$ .

We will analyze the “best response” procedure (as in Algorithm 1). We say the procedure converges if  $\lim_{i \rightarrow \infty} \phi^i$  and  $\lim_{i \rightarrow \infty} \theta^i$  exist.

---

### Algorithm 1 Best Response

---

```

Initialize  $\theta^0$ .
for  $i = 1$  to  $T$  do
    Let  $\phi^i = \arg \max_{\phi} \mathbb{E}_{\tau \sim \mathcal{D}_{true}} [D_\phi(\tau)] - \mathbb{E}_{\tau \sim G(\theta)} [D_\phi(\tau)]$ .
    Let  $\theta^i = \arg \min_{\theta} - \mathbb{E}_{\tau \sim G(\theta)} [D_\phi(\tau)]$ .
end for

```

---

**Theorem B.1.** *For generator  $G$  and discriminator  $D$  in Example 1, for every choice of parameter  $\theta$ , there is a choice of  $\phi$  such that  $D_\phi(\theta) \leq 0.001$  and  $\mathbb{E}_{\tau \sim \mathcal{D}_{\square \nabla \square}} [D_\phi(\tau)] \geq 1/3$ . On the other hand, for every choice of  $\phi$ , there is always a  $\theta$  such that  $D_\phi(\theta) = 1$ . As a result, the sequence of best response cannot converge.*

*Proof.* For any  $\theta$ , we can just choose  $\phi$  to be the farthest point in  $\{0, 2\pi/3, 4\pi/3\}$ . Clearly the distance is at least  $2\pi/3$  and therefore  $D_\phi(\theta) \leq \exp(-10) \leq 0.001$ . On the other hand, for the true distribution, it has 1/3 probability of generating the point  $\phi$ , therefore  $\mathbb{E}_{\tau \sim \mathcal{D}_{\square \nabla \square}} [D_\phi(\tau)] \geq 1/3$ . For every  $\phi$ , we can always choose  $\theta = \phi$ , and we have  $D_\phi(\theta) = 1$ .

By the construction of  $\phi^i$  and  $\theta^i$  in Algorithm 1, we know for any  $i$   $D_{\phi^i}(\theta^i) = 1$ , but  $\mathbb{E}_{\tau \sim \mathcal{D}_{true}} [D_{\phi^i}(\tau)] - D_{\phi^{i-1}}(\theta^i) \geq 1/4$ . Therefore  $|D_{\phi^i}(\theta^i) - D_{\phi^{i-1}}(\theta^i)| \geq 1/4$  for all  $i$  and the sequences cannot converge.  $\square$



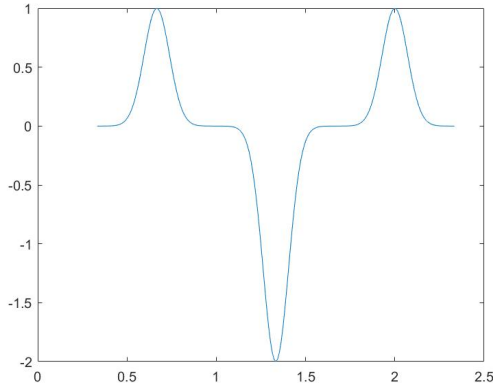

Figure 6: Optimization problem for  $\phi$

This may not be very surprising as the generator does not even have the capacity to generate the true distribution. One might hope that once we use a large enough neural network, the generator will be able to generate the true distribution. However, our next example shows even in that case the best response algorithm may not converge.

**Definition 4** (Example 2). Let  $\theta, \phi \in [0, 2\pi)^3$  will be 3 -dimensional vectors. The generator  $G(\theta)$  generates the uniform distribution over points  $\theta_1, \theta_2, \theta_3$ . The discriminator function is chosen to be  $D_\phi(\tau) = \frac{1}{3} \sum_{i=1}^3 \exp(-10d(\tau, \phi_i)^2)$ .

Clearly in this example, the true distribution can be generated by the generator (just by choosing  $\theta = (0, 2\pi/3, 4\pi/3)$ ). However we will show that the best response algorithm still cannot always converge.

**Theorem B.2.** *Suppose the generator and discriminator are described as in Example 2, and  $\theta^0 = (0, 0, 0)$ , then we have: (1) In every iteration the three points for generator  $\theta_{1,2,3}^i$  are equal to each other. (2) In every iteration  $\theta_1^i$  is 0.1-close to one of the true points  $\{0, 2\pi/3, 4\pi/3\}$ , and its closest point is different from the previous iteration.*

Before giving detailed calculations, we first give an intuitive argument. In this example, we will use induction to prove that at every iteration  $t$ , two properties are preserved: 1. The three points of the generator ( $\theta_1^t, \theta_2^t, \theta_3^t$ ) are close to the same real example ( $0, 2\pi/3$  or  $4\pi/3$ ); 2. The three points of the discriminator ( $\phi_1^{t+1}, \phi_2^{t+1}, \phi_3^{t+1}$ ) will be close to the other two real examples. To go from 1 to 2, notice that in this case the three  $\phi$  values can be optimized independently (and the final objective is the sum of the three), so it suffices to argue for one of them. For one  $\phi$ , by our construction the objective function is really close to the sum of two Gaussians at the other two real examples, minus twice of a Gaussian at the real example that  $\theta_i^t$ 's are close to (see Figure 6). From the Figure it is clear that the maximum of this function is close to one of the real examples that is different from  $\theta_i^t$ . Now all the three  $\phi_i^{t+1}$ 's will be close to one of the two real examples, so one of them is going to get at least two  $\phi_i^{t+1}$ 's. In the next iteration, as the generator is trying to maximize the output of discriminator, all three  $\theta_i^{t+1}$ 's will be close to the real example with at least two  $\phi_i^{t+1}$ 's.

Now we make this intuition formal through calculations.

*Proof.* The optimization problems here are fairly simple and we can argue about the solutions directly. Throughout the proof we will use the fact that  $\exp(-10*(2\pi/3)^2) < 1e-4$  and  $\exp(1+\epsilon) \approx 1 + \epsilon$ . The following claim describes the properties we need:

**Claim 1.** *If  $\theta_1 = \theta_2 = \theta_3$  and  $\theta_1$  is 0.1-close to one of  $\{0, 2\pi/3, 4\pi/3\}$ , then the optimal  $\phi$  must satisfy  $\phi_1, \phi_2, \phi_3$  be 0.05-close to the other two points in  $\{0, 2\pi/3, 4\pi/3\}$ .*

We first prove the Theorem with the claim. We will do this by induction. The induction hypothesis is that for every  $j \leq t$ , we have  $\theta_{1,2,3}^j$  are equal to each other, and  $\theta_1^j$  is 0.1-close to one of the true points  $\{0, 2\pi/3, 4\pi/3\}$ . This is clearly true for  $t = 0$ . Now let us assume this is true for  $t$  and consider iteration  $t + 1$ .

Without loss of generality we assume  $\theta_1^t$  is close to 0. Now by Claim we know  $\phi_1^t, \phi_2^t, \phi_3^t$  are 0.05-close to either  $2\pi/3$  or  $4\pi/3$ . Without loss of generality assume there are more  $\phi_i^t$ 's close to  $2\pi/3$  (the number of  $\phi_i^t$ 's close to the two point has to be different because there are 3  $\phi_i^t$ 's). Now, by property of Gaussians, we know  $D_{\phi^t}(\tau)$  has a unique maximum that is within 0.1 of  $2\pi/3$  (the influence from the other point is much smaller than 0.05). Since the generator is trying to maximize  $\mathbb{E}_{\tau \sim G(\theta)}[D_{\phi}(\tau)]$ , all three  $\theta_i^t (i = 1, 2, 3)$  should be at this maximizer. This finishes the induction.  $\square$

Now we prove the claim.

*Proof.* The objective function is

$$\max_{\phi} \frac{1}{3} \left( \mathbb{E}_{\tau \sim \mathcal{D}_{true}} \left[ \sum_{i=1}^3 \exp(-10d(\tau, \phi_i)^2) \right] - \mathbb{E}_{\tau \sim G(\theta)} \left[ \sum_{i=1}^3 \exp(-10d(\tau, \phi_i)^2) \right] \right).$$

In this objective function  $\phi_i$ 's do not interact with each other, so we can break the objective function into three (one for each  $\phi_i$ ). Without loss of generality, assume  $\theta_{1,2,3}$  are 0.1-close to 0, we are trying to maximize

$$\max_{\phi} \left( \frac{1}{3} \sum_{i=1}^3 \exp(-10d(\phi, i \cdot 2\pi/3)^2) - \exp(-10d(\theta, \phi)^2) \right).$$

Clearly, if  $\phi$  is not 0.05 close to either  $2\pi/3$  or  $4\pi/3$ , we have  $D \leq 1/3 - 10 \cdot 0.05^2 + \exp(-10) \leq 1/3 - 0.02$ . On the other hand, when  $\phi = 2\pi/3$  or  $4\pi/3$ , we have  $D \geq 1/3 - \exp(-10)$ . Therefore the maximum must be 0.05-close to one of the two points.  $\square$

Note that this example is very similar to the *mode collapse* problem mentioned in NIPS 2016 GAN tutorial[Goodfellow, 2016].
